# Supplementary material for: Ganoderma tsugae Inhibits the SREBP-1/AR Axis Leading to Suppression of Cell Growth and Activation of Apoptosis in Prostate Cancer Cells
Source: MDPI journal article supplement (doi:10.3390/molecules23102539), 2018-10-05
Supplement: s1 [file s1]

Table S1. The oligonucleotide primer sets for qPCR.

| <b>Gene</b>    | <b>Forward (5'-3')</b>          | <b>Reverse (5'-3')</b>          |
|----------------|---------------------------------|---------------------------------|
| SREBP-1        | TCAGCGAGGCGGCTTTGGAGCAG         | CATGTCTTCGATGTCGGTCAG           |
| SREBP-2        | CCCCTGACTTCCCTGCTGCA            | GCGCGAGTGTGGCCGGATC             |
| FASN           | CGGTACGCGACGGCTGCCTG            | GCTGCTCCACGAACTCAAACACCG        |
| HMGCR          | GTCATTCCAGCCAAGGTTGT            | GGGACCACTTGCTTCCATTA            |
| AR             | ATGGCTGTCATTCAGTACTCCTGGA       | AGATGGGCTTGACTTTCCCAGAAAG       |
| PSA            | ATGTGGGTCCCGGTTGTCTTCCTCACCTGTC | ATGTGGGTCCCGGTTGTCTTCCTCACCTGTC |
| $\beta$ -actin | CAAGGCCAACCGCGAGAAGATGAC        | GCCAGAGGCGTACAGGGATAGCACA       |
