# Supplementary material for: Ganoderma tsugae Inhibits the SREBP-1/AR Axis Leading to Suppression of Cell Growth and Activation of Apoptosis in Prostate Cancer Cells
Source: MDPI journal article supplement (doi:10.3390/molecules23102539), 2018-10-05
Supplement: s1 [file s1]

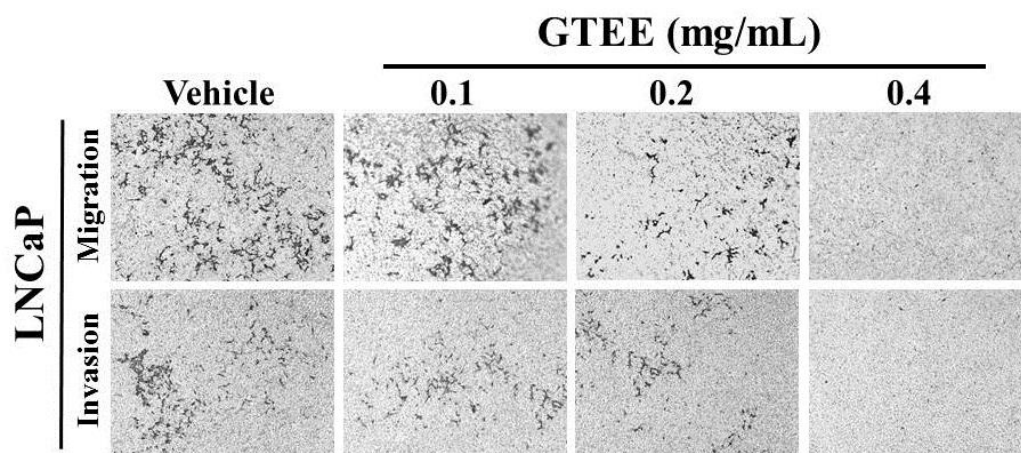

**Figure S1.** Representative images of the migration and invasion of LNCaP cells treated with vehicle or GTEE were shown.
