# Supplementary material for: Ganoderma tsugae Inhibits the SREBP-1/AR Axis Leading to Suppression of Cell Growth and Activation of Apoptosis in Prostate Cancer Cells
Source: MDPI journal article supplement (doi:10.3390/molecules23102539), 2018-10-05
Supplement: s1 [file s1]

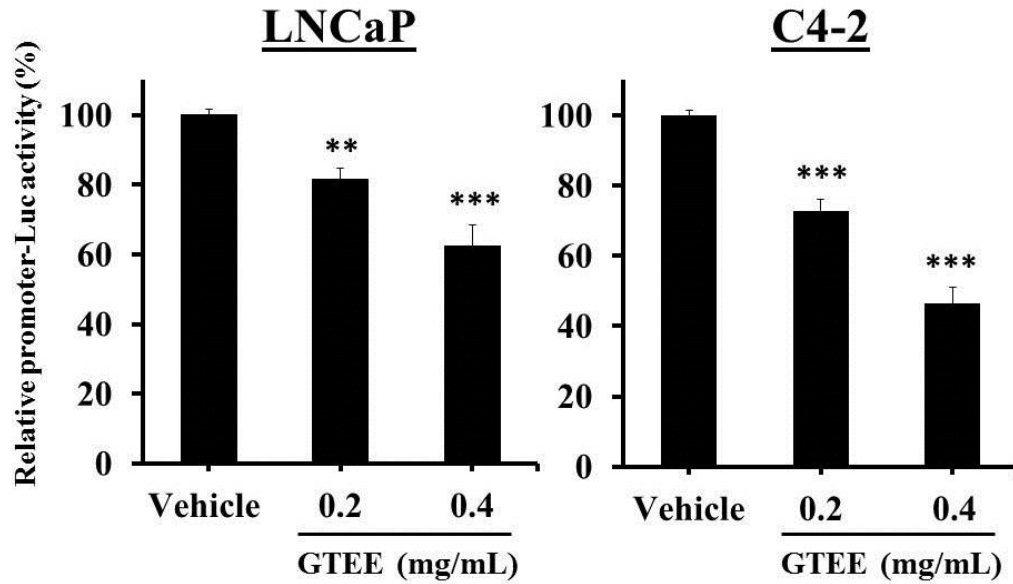

**Figure S2.** The promoter-luciferase (Luc) reporter activity of SREBP-1 (5'-flanking promoter region of SREBP-1: -1477/+158; obtained from GeneCopoeia) was inhibited by GTEE (0.2 and 0.4 mg/mL) in PCa cells. The relative promoter-Luc activities were shown as the mean  $\pm$  SD of three independent experiments. \*\* $P < 0.01$ , \*\*\* $P < 0.001$ .
